# Supplementary material for: Comparison of the Properties of Pullulan-Based Active Edible Coatings Implemented for Improving Sliced Cheese Shelf Life
Source: MDPI journal article supplement (doi:10.3390/polym16020178), 2024-01-07
Supplement: s1 [file s1]

File :C:\MSD DATA\2022\Milica\Maj\Cymbo pogoncitatus 2021 H LN.D  
 Operator :  
 Acquired : 31 May 2022 10:55 using AcqMethod ADAMS 50.M  
 Instrument : GCMS  
 Sample Name: CYMBO POGONCITATUS 2021  
 Misc Info :  
 Vial Number: 55

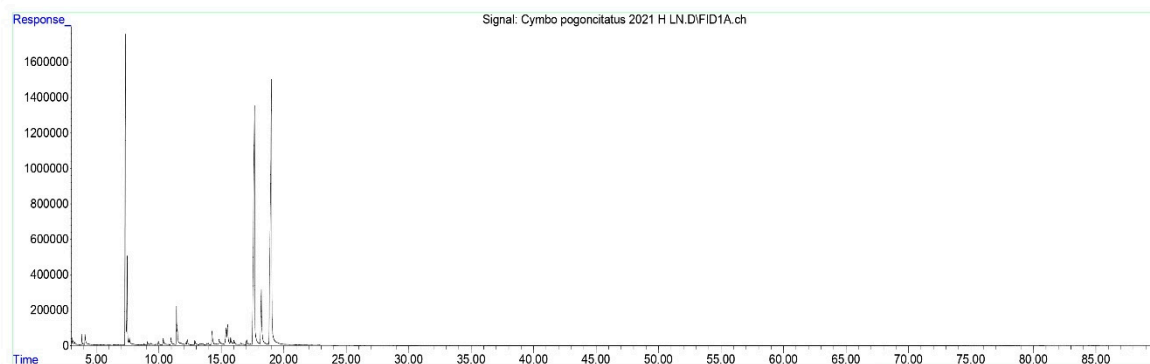

Figure S1. Chromatogram of lemongrass hydrolat.

File :C:\MSD DATA\2023\Milica\Hidrolati 2022\H Helicrysum italicum  
 ... 2021 50.D  
 Operator :  
 Instrument : GCMS  
 Acquired : 3 Feb 2023 16:48 using AcqMethod ADAMS 50.M  
 Sample Name: H Helicrysum italicum 2021  
 Misc Info :

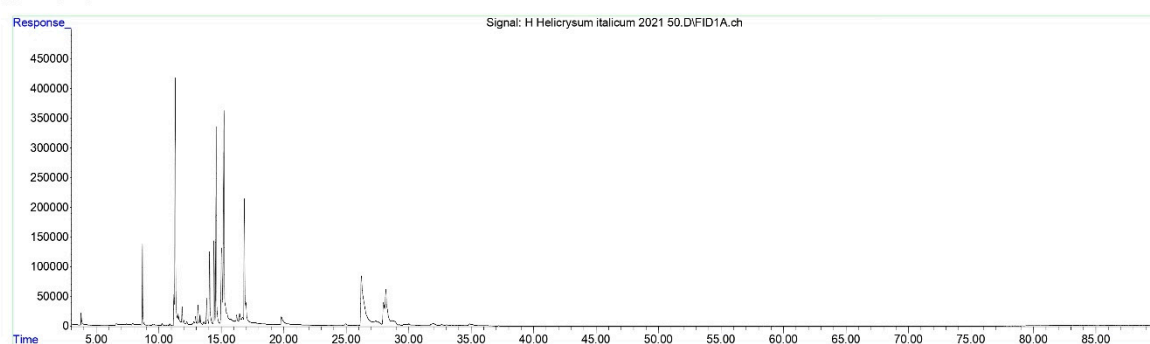

Figure S2. Chromatogram of curry plant hydrolat.
